# Supplementary material for: Adaptation and Validation of the Hydration Status Questionnaire in a Spanish Adolescent-Young Population: A Cross Sectional Study
Source: MDPI journal article supplement (doi:10.3390/nu11030565), 2019-03-06
Supplement: s1 [file s1]

## **THE HYDRATION STATUS QUESTIONNAIRE FOR ADOLESCENT-YOUNG POPULATION (HSQ-AY)**

### INSTRUCTION FOR COMPLETING THE QUESTIONNAIRE:

- Please read all the questions carefully and take your time while answering them.
- Concentrate while reading the questions and try to answer them as accurately as possible.
- Use an X to mark the answer that better represents your situation.
- Some questions can be answered with more than one answer, if so; this will be indicated in the column on the left.
- Some questions are accompanied by an asterisk (\*). This means you will find an explanatory footnote on the bottom of the page.
- At the beginning of each section, you will find a description that will assist you in filling out the questions in that segment.

## 1. Personal Information

## 2. Medical history

|      |  |        |  |         |  |      |  |
|------|--|--------|--|---------|--|------|--|
| Name |  |        |  | Surname |  |      |  |
| Age  |  | Course |  | Gender  |  | Date |  |

|                                                                                                               |                                                                                                                                                                                                                                                                                                                                                                                                                                                                                                        |
|---------------------------------------------------------------------------------------------------------------|--------------------------------------------------------------------------------------------------------------------------------------------------------------------------------------------------------------------------------------------------------------------------------------------------------------------------------------------------------------------------------------------------------------------------------------------------------------------------------------------------------|
| <p><b>Do you have any disease or health problem?</b></p>                                                      | <input type="checkbox"/> Yes <input type="checkbox"/> No                                                                                                                                                                                                                                                                                                                                                                                                                                               |
| <p><b>Do you suffer from one of these illnesses?</b></p> <p>MULTIPLE ANSWER POSSIBLE</p>                      | <input type="checkbox"/> Diabetes <input type="checkbox"/> Urinary tract infection<br><input type="checkbox"/> Bowel disease <input type="checkbox"/> Heart failure<br><input type="checkbox"/> Kidney disease <input type="checkbox"/> Other: _____<br>(Please specify)                                                                                                                                                                                                                               |
| <p><b>Do you take any of these medications?</b></p> <p>MULTIPLE ANSWER POSSIBLE</p>                           | <input type="checkbox"/> Laxative → Medication that accelerates intestinal transit. It is used to correct constipation.<br><input type="checkbox"/> Diuretic → Medication to eliminate more fluids. They increase the urine production.<br><input type="checkbox"/> Anti-inflammatory → Medication to reduce inflammation and pain, such as ibuprofen.<br><input type="checkbox"/> Anti-hypertensive → Medication to control the tension.<br><input type="checkbox"/> Other: _____<br>(Please specify) |
| <p><b>Do you take any nutritional supplement as for example vitamins or minerals?</b></p>                     | <input type="checkbox"/> Yes <input type="checkbox"/> No<br>If the answer is affirmative, please indicate the type:                                                                                                                                                                                                                                                                                                                                                                                    |
| <p><b>Do you suffer from any of these symptoms?</b></p> <p>MULTIPLE ANSWER POSSIBLE</p>                       | <input type="checkbox"/> Shivers <input type="checkbox"/> Constipation <input type="checkbox"/> Diarrhoea<br><input type="checkbox"/> Dizziness <input type="checkbox"/> Cramps <input type="checkbox"/> Tachycardia<br><input type="checkbox"/> Headache <input type="checkbox"/> Asthenia/fatigue <input type="checkbox"/> Dry mouth<br><input type="checkbox"/> Lack of concentration                                                                                                               |
| <p><b>Do you have difficulty performing any of the following actions?</b></p> <p>MULTIPLE ANSWER POSSIBLE</p> | <input type="checkbox"/> Holding a cup <input type="checkbox"/> Swallowing <input type="checkbox"/> Opening a bottle                                                                                                                                                                                                                                                                                                                                                                                   |

## 3. Hydration habits

|                                                                                         |                                                                 |                             |
|-----------------------------------------------------------------------------------------|-----------------------------------------------------------------|-----------------------------|
| <b>Do you usually have a bottle of water with you when you are outside?</b>             | <input type="checkbox"/> Yes                                    | <input type="checkbox"/> No |
| <b>Do you take a bottle of water when you go to school?</b>                             | <input type="checkbox"/> Yes                                    | <input type="checkbox"/> No |
| <b>Do you drink water between meals?</b>                                                | <input type="checkbox"/> Yes                                    | <input type="checkbox"/> No |
| <b>Do you drink any water while performing physical activity?</b>                       | <input type="checkbox"/> Yes                                    | <input type="checkbox"/> No |
| <b>Do you consume isotonic and/or energy drinks while performing physical activity?</b> | <input type="checkbox"/> Yes                                    | <input type="checkbox"/> No |
| <b>Do you consume any fluid before feeling thirsty?</b>                                 | <input type="checkbox"/> Yes                                    | <input type="checkbox"/> No |
| <b>Do you like drinking water?</b>                                                      | <input type="checkbox"/> Yes                                    | <input type="checkbox"/> No |
| <b>When you are thirsty, do you prefer to consume other beverages instead of water?</b> | <input type="checkbox"/> Yes                                    | <input type="checkbox"/> No |
|                                                                                         | If the answer is affirmative, please indicate the type: _____   |                             |
| <b>Do you feel full after drinking fluids?</b>                                          | <input type="checkbox"/> Yes                                    | <input type="checkbox"/> No |
| <b>Do you know which is the daily water intake recommendation?</b>                      | <input type="checkbox"/> Yes                                    | <input type="checkbox"/> No |
|                                                                                         | If the answer is affirmative, please indicate the amount: _____ |                             |

#### 4. Food and beverage frequency questionnaire

**First column:** Use an x to indicate the serving size that you usually consume  
**Second column:** Use numbers to indicate the frequency of consumption; daily, per week or per month. (If the frequency is less than one per month do not answer the question)  
**Third column.** Use an X to indicate the moments at which do you usually consume the product.

**WATER.** (It includes tap water, bottle water, fizzy water and water flavoured)

| Indicate the habitual serving size                                                                                                                                                                                   | Indicate the number of glasses or bottles that you usually consume daily                                                                                                                                                                                                                                                                                                                        | Indicate the moments at which you usually consume water                                                                                                                      |
|----------------------------------------------------------------------------------------------------------------------------------------------------------------------------------------------------------------------|-------------------------------------------------------------------------------------------------------------------------------------------------------------------------------------------------------------------------------------------------------------------------------------------------------------------------------------------------------------------------------------------------|------------------------------------------------------------------------------------------------------------------------------------------------------------------------------|
| <br>200 ml <input type="checkbox"/> 250 ml <input type="checkbox"/> 330 ml <input type="checkbox"/> 500 ml <input type="checkbox"/> | 1 <input type="checkbox"/> 2 <input type="checkbox"/> 3 <input type="checkbox"/><br>4 <input type="checkbox"/> 5 <input type="checkbox"/> 6 <input type="checkbox"/><br>7 <input type="checkbox"/> 8 <input type="checkbox"/> 9 <input type="checkbox"/><br>10 <input type="checkbox"/> 11 <input type="checkbox"/> 12 <input type="checkbox"/><br><br>If the amount is higher, please specify: | With breakfast <input type="checkbox"/><br><br>With lunch <input type="checkbox"/><br><br>With dinner <input type="checkbox"/><br><br>Between hours <input type="checkbox"/> |

**JUICES** (Naturals and bottled)

|                    | Indicate the habitual serving size                                                                                                                                                         | Indicate the number of glasses or packages that you usually consume daily, per week or per month. |          |        | Indicate the moments of consumption |                                         |
|--------------------|--------------------------------------------------------------------------------------------------------------------------------------------------------------------------------------------|---------------------------------------------------------------------------------------------------|----------|--------|-------------------------------------|-----------------------------------------|
| Type 1: Fruits     | <br><input type="checkbox"/> <input type="checkbox"/> <input type="checkbox"/> <input type="checkbox"/> | Daily                                                                                             | Type 1   | Type 2 | Type 3                              | With breakfast <input type="checkbox"/> |
| Type 2: Vegetables |                                                                                                                                                                                            |                                                                                                   | Per week | Type 1 | Type 2                              | Type 3                                  |
| Type 3: With milk  |                                                                                                                                                                                            | Per month                                                                                         | Type 1   | Type 2 | Type 3                              | With dinner <input type="checkbox"/>    |
|                    |                                                                                                                                                                                            |                                                                                                   |          |        |                                     | Between hours <input type="checkbox"/>  |

**SODAS**

|                | Indicate the habitual serving size                                                                                                                                                                                  | Indicate the number of glasses or packages that you usually consume daily, per week or per month. |          |        | Indicate the moments of consumption |                                         |
|----------------|---------------------------------------------------------------------------------------------------------------------------------------------------------------------------------------------------------------------|---------------------------------------------------------------------------------------------------|----------|--------|-------------------------------------|-----------------------------------------|
| Type 1: Normal | <br><input type="checkbox"/> <input type="checkbox"/> <input type="checkbox"/> <input type="checkbox"/> <input type="checkbox"/> | Daily                                                                                             | Type 1   | Type 2 | Type 3                              | With breakfast <input type="checkbox"/> |
| Type 2: Light  |                                                                                                                                                                                                                     |                                                                                                   | Per week | Type 1 | Type 2                              | Type 3                                  |
| Type 3: Zero   |                                                                                                                                                                                                                     | Per month                                                                                         | Type 1   | Type 2 | Type 3                              | With dinner <input type="checkbox"/>    |
|                |                                                                                                                                                                                                                     |                                                                                                   |          |        |                                     | Between hours <input type="checkbox"/>  |

|                            | Indicate the habitual serving size                                                                                                                                                                                | Indicate the number of glasses or packages that you usually consume daily, per week or per month |        |        | Indicate the moments of consumption     |
|----------------------------|-------------------------------------------------------------------------------------------------------------------------------------------------------------------------------------------------------------------|--------------------------------------------------------------------------------------------------|--------|--------|-----------------------------------------|
| Type 1: Isotonic beverages | <br><input type="checkbox"/> <input type="checkbox"/> <input type="checkbox"/> <input type="checkbox"/> <input type="checkbox"/> | Daily                                                                                            | Type 1 | Type 2 | With breakfast <input type="checkbox"/> |
| Type 2: Energy beverages   |                                                                                                                                                                                                                   | Per week                                                                                         | Type 1 | Type 2 | With lunch <input type="checkbox"/>     |
|                            |                                                                                                                                                                                                                   | Per month                                                                                        | Type 1 | Type 2 | With dinner <input type="checkbox"/>    |
|                            |                                                                                                                                                                                                                   |                                                                                                  |        |        | Between hours <input type="checkbox"/>  |

### MILK AND DAIRY PRODUCTS.

**Milk** → (It includes milk, milk with cacao, with honey and or with cereals. It not includes milk with coffee or milk in milkshakes).

|                           | Indicate the habitual serving size                                                                                                                                                    | Indicate the number of glasses or packages that you usually consume daily, per week or per month |        |        | Indicate the moments of consumption |                                         |
|---------------------------|---------------------------------------------------------------------------------------------------------------------------------------------------------------------------------------|--------------------------------------------------------------------------------------------------|--------|--------|-------------------------------------|-----------------------------------------|
| Type 1: Whole milk        | <br>200 ml <input type="checkbox"/> 250 ml <input type="checkbox"/> 350 ml <input type="checkbox"/> | Daily                                                                                            | Type 1 | Type 2 | Type 3                              | With breakfast <input type="checkbox"/> |
| Type 2: Milk semi-skimmed |                                                                                                                                                                                       | Per week                                                                                         | Type 1 | Type 2 | Type 3                              | With lunch <input type="checkbox"/>     |
| Type 3: Milk skimmed      |                                                                                                                                                                                       | Per month                                                                                        | Type 1 | Type 2 | Type 3                              | With dinner <input type="checkbox"/>    |
|                           |                                                                                                                                                                                       |                                                                                                  |        |        |                                     | Between hours <input type="checkbox"/>  |

### Milkshakes and yoghurts.

|                        | Indicate the habitual serving size                                                                                                                                                                                     | Indicate the number of glasses or packages that you usually consume daily, per week or per month. |        |        | Indicate the moments of consumption |                                         |
|------------------------|------------------------------------------------------------------------------------------------------------------------------------------------------------------------------------------------------------------------|---------------------------------------------------------------------------------------------------|--------|--------|-------------------------------------|-----------------------------------------|
| Type 1: Milkshakes     | <br>100 ml <input type="checkbox"/> 125 ml <input type="checkbox"/> 200 ml <input type="checkbox"/> 330 ml <input type="checkbox"/> | Daily                                                                                             | Type 1 | Type 2 | Type 3                              | With breakfast <input type="checkbox"/> |
| Type 2: Liquid yoghurt |                                                                                                                                                                                                                        | Per week                                                                                          | Type 1 | Type 2 | Type 3                              | With lunch <input type="checkbox"/>     |
| Type 3: yoghurt        |                                                                                                                                                                                                                        | Per month                                                                                         | Type 1 | Type 2 | Type 3                              | With dinner <input type="checkbox"/>    |
|                        |                                                                                                                                                                                                                        |                                                                                                   |        |        |                                     | Between hours <input type="checkbox"/>  |

## COFFEE

|                                                 | Indicate the habitual serving size                                                                                                                                                           | Indicate the number of cups that you usually consume daily, per week or per month |          |        | Indicate the moments of consumption    |                                         |
|-------------------------------------------------|----------------------------------------------------------------------------------------------------------------------------------------------------------------------------------------------|-----------------------------------------------------------------------------------|----------|--------|----------------------------------------|-----------------------------------------|
| Type 1:<br>Espresso coffee                      | <br>40 ml    125 ml    250 ml<br><input type="checkbox"/> <input type="checkbox"/> <input type="checkbox"/> | Daily                                                                             | Type 1   | Type 2 | Type 3                                 | With breakfast <input type="checkbox"/> |
| Type 2:<br>Coffee with milk                     |                                                                                                                                                                                              |                                                                                   | Per week | Type 1 | Type 2                                 | Type 3                                  |
| Type 3:<br>American coffee (Large black coffee) |                                                                                                                                                                                              | Per month                                                                         |          | Type 1 | Type 2                                 | Type 3                                  |
|                                                 |                                                                                                                                                                                              |                                                                                   |          |        | Between hours <input type="checkbox"/> |                                         |

## INFUSIONS

| Indicate the habitual serving size                                                                                                                           | Indicate the number of cups that you usually consume daily, per week or per month |  | Indicate the moments of consumption     |
|--------------------------------------------------------------------------------------------------------------------------------------------------------------|-----------------------------------------------------------------------------------|--|-----------------------------------------|
| <br>125 ml    250 ml<br><input type="checkbox"/> <input type="checkbox"/> | Daily                                                                             |  | With breakfast <input type="checkbox"/> |
|                                                                                                                                                              | Per week                                                                          |  | With lunch <input type="checkbox"/>     |
|                                                                                                                                                              | Per month                                                                         |  | With dinner <input type="checkbox"/>    |
|                                                                                                                                                              |                                                                                   |  | Between hours <input type="checkbox"/>  |

## ALCOHOLIC BEVERAGES

|                    | Indicate the habitual serving size                                                                                                                                                                                  | Indicate the number of glasses that you usually consume daily, per week or per month |          |        | Indicate the moments of consumption    |                                         |
|--------------------|---------------------------------------------------------------------------------------------------------------------------------------------------------------------------------------------------------------------|--------------------------------------------------------------------------------------|----------|--------|----------------------------------------|-----------------------------------------|
| Type 1:<br>Sangría | <br><input type="checkbox"/> <input type="checkbox"/> <input type="checkbox"/> <input type="checkbox"/> <input type="checkbox"/> | Daily                                                                                | Type 1   | Type 2 | Type 3                                 | With breakfast <input type="checkbox"/> |
| Type 2:<br>Cider   |                                                                                                                                                                                                                     |                                                                                      | Per week | Type 1 | Type 2                                 | Type 3                                  |
| Type 3:<br>Wine    |                                                                                                                                                                                                                     | Per month                                                                            |          | Type 1 | Type 2                                 | Type 3                                  |
|                    |                                                                                                                                                                                                                     |                                                                                      |          |        | Between hours <input type="checkbox"/> |                                         |

| Indicate the habitual serving size                                                                                                                                                                                           | Indicate the number of units that you usually consume daily, per week or per month. |  | Indicate the moments of consumption     |
|------------------------------------------------------------------------------------------------------------------------------------------------------------------------------------------------------------------------------|-------------------------------------------------------------------------------------|--|-----------------------------------------|
| <br>200 ml   250 ml   330ml   500 ml<br><input type="checkbox"/> <input type="checkbox"/> <input type="checkbox"/> <input type="checkbox"/> | Daily                                                                               |  | With breakfast <input type="checkbox"/> |
|                                                                                                                                                                                                                              | Per week                                                                            |  | With lunch <input type="checkbox"/>     |
|                                                                                                                                                                                                                              | Per month                                                                           |  | With dinner <input type="checkbox"/>    |
|                                                                                                                                                                                                                              |                                                                                     |  | Between hours <input type="checkbox"/>  |

| Indicate the habitual serving sizes                                                                                                                                                      | Indicate the number of units that you usually consume daily, per week or per month |  | Indicate the moments of consumption     |
|------------------------------------------------------------------------------------------------------------------------------------------------------------------------------------------|------------------------------------------------------------------------------------|--|-----------------------------------------|
| <br><input type="checkbox"/> <input type="checkbox"/> <input type="checkbox"/> <input type="checkbox"/> | Daily                                                                              |  | With breakfast <input type="checkbox"/> |
|                                                                                                                                                                                          | Per week                                                                           |  | With lunch <input type="checkbox"/>     |
|                                                                                                                                                                                          | Per month                                                                          |  | With dinner <input type="checkbox"/>    |
|                                                                                                                                                                                          |                                                                                    |  | Between hours <input type="checkbox"/>  |

### OTHER BEVERAGES

|                                                                                             | Indicate the habitual serving sizes                                                                                                                                                           | Indicate the number of glasses that you usually consume daily, per week or per month. |        | Indicate the moments of consumption |                                         |
|---------------------------------------------------------------------------------------------|-----------------------------------------------------------------------------------------------------------------------------------------------------------------------------------------------|---------------------------------------------------------------------------------------|--------|-------------------------------------|-----------------------------------------|
| <b>Type 1:</b><br>Plant-based beverages (soy, oats, almonds)<br><b>Type 2:</b><br>Horchata. | <br>200 ml   250 ml   350 ml<br><input type="checkbox"/> <input type="checkbox"/> <input type="checkbox"/> | Daily                                                                                 | Type 1 | Type 2                              | With breakfast <input type="checkbox"/> |
|                                                                                             |                                                                                                                                                                                               | Per week                                                                              | Type 1 | Type 2                              | With lunch <input type="checkbox"/>     |
|                                                                                             |                                                                                                                                                                                               | Per month                                                                             | Type 1 | Type 2                              | With dinner <input type="checkbox"/>    |
|                                                                                             |                                                                                                                                                                                               |                                                                                       |        |                                     | Between hours <input type="checkbox"/>  |

Do you usually consume some beverage that is not included in the questionnaire? If the answer is affirmative, please indicate it below.

| TYPE | AMOUNT | FREQUENCY | MOMENTS |
|------|--------|-----------|---------|
|------|--------|-----------|---------|

- 
- 
- 
- 
-

**FRUITS.** (It includes whole fruits. It not includes fruits juices or milkshakes)

**Use an X to indicate the fruits that you usually consume.**  
 In the column on the right, next to its corresponding letter, use a number to indicate how many times you consume this fruit (daily, per week or per month). Finally, indicate the habitual serving size  
 Example: If you usually consume strawberries ones a week, oranges one per month you should write: per week (A-1) per month (C-1).

|                                                                                                                |                                                                                                       |                                                                                                      |                                                                                                  |
|----------------------------------------------------------------------------------------------------------------|-------------------------------------------------------------------------------------------------------|------------------------------------------------------------------------------------------------------|--------------------------------------------------------------------------------------------------|
| A<br><br>Watermelon/<br>melon | B<br><br>Pomegranate | C<br><br>Grapefruit | D<br><br>Grapes |
|----------------------------------------------------------------------------------------------------------------|-------------------------------------------------------------------------------------------------------|------------------------------------------------------------------------------------------------------|--------------------------------------------------------------------------------------------------|

|                                 |              |                 |                  |
|---------------------------------|--------------|-----------------|------------------|
| <b>Frequency of consumption</b> | <b>Daily</b> | <b>Per week</b> | <b>Per month</b> |
|                                 | A:           | A:              | A:               |
|                                 | B:           | B:              | B:               |
|                                 | C:           | C:              | C:               |
|                                 | D:           | D:              | D:               |
| <b>Serving size</b>             | <b>Big</b>   | <b>Normal</b>   | <b>Little</b>    |
|                                 |              |                 |                  |

|                                                                                                               |                                                                                                        |                                                                                                  |                                                                                                  |
|---------------------------------------------------------------------------------------------------------------|--------------------------------------------------------------------------------------------------------|--------------------------------------------------------------------------------------------------|--------------------------------------------------------------------------------------------------|
| A<br><br>Peach/<br>Nectarine | B<br><br>Strawberries | C<br><br>Orange | D<br><br>Papaya |
|---------------------------------------------------------------------------------------------------------------|--------------------------------------------------------------------------------------------------------|--------------------------------------------------------------------------------------------------|--------------------------------------------------------------------------------------------------|

|                                 |              |                 |                  |
|---------------------------------|--------------|-----------------|------------------|
| <b>Frequency of consumption</b> | <b>Daily</b> | <b>Per week</b> | <b>Per month</b> |
|                                 | A:           | A:              | A:               |
|                                 | B:           | B:              | B:               |
|                                 | C:           | C:              | C:               |
|                                 | D:           | D:              | D:               |
| <b>Serving size</b>             | <b>Big</b>   | <b>Normal</b>   | <b>Little</b>    |
|                                 |              |                 |                  |

|                                                                                                              |                                                                                                       |                                                                                                             |                                                                                                                |
|--------------------------------------------------------------------------------------------------------------|-------------------------------------------------------------------------------------------------------|-------------------------------------------------------------------------------------------------------------|----------------------------------------------------------------------------------------------------------------|
| A<br><br>Apricot/<br>Plum | B<br><br>Pineapple | C<br><br>Peeae/<br>apple | D<br><br>Kiwi/<br>tangerine |
|--------------------------------------------------------------------------------------------------------------|-------------------------------------------------------------------------------------------------------|-------------------------------------------------------------------------------------------------------------|----------------------------------------------------------------------------------------------------------------|

|                                 |              |                 |                  |
|---------------------------------|--------------|-----------------|------------------|
| <b>Frequency of consumption</b> | <b>Daily</b> | <b>Per week</b> | <b>Per month</b> |
|                                 | A:           | A:              | A:               |
|                                 | B:           | B:              | B:               |
|                                 | C:           | C:              | C:               |
|                                 | D:           | D:              | D:               |
| <b>Serving size</b>             | <b>Big</b>   | <b>Normal</b>   | <b>Little</b>    |
|                                 |              |                 |                  |

|                                                                                                      |                                                                                                   |                                                                                                   |                                                                                                  |
|------------------------------------------------------------------------------------------------------|---------------------------------------------------------------------------------------------------|---------------------------------------------------------------------------------------------------|--------------------------------------------------------------------------------------------------|
| A<br><br>Cherries | B<br><br>Mango | C<br><br>Khaki | D<br><br>Figs |
|------------------------------------------------------------------------------------------------------|---------------------------------------------------------------------------------------------------|---------------------------------------------------------------------------------------------------|--------------------------------------------------------------------------------------------------|

|                                 |              |                 |                  |
|---------------------------------|--------------|-----------------|------------------|
| <b>Frequency of consumption</b> | <b>Daily</b> | <b>Per week</b> | <b>Per month</b> |
|                                 | A:           | A:              | A:               |
|                                 | B:           | B:              | B:               |
|                                 | C:           | C:              | C:               |
|                                 | D:           | D:              | D:               |
| <b>Serving size</b>             | <b>Big</b>   | <b>Normal</b>   | <b>Little</b>    |
|                                 |              |                 |                  |



## VEGETABLES

Use an **X** to indicate the vegetables that you usually consume.

In the column on the right, next to it corresponding letter, use a number to indicate how many times you consume this fruit (daily, per week or per month). At last, indicate the habitual serving size

It not include vegetables soups or purees.

Example of serving size:

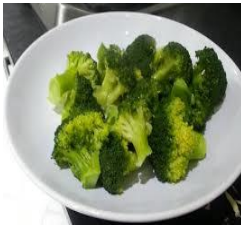

Main dish: Broccoli

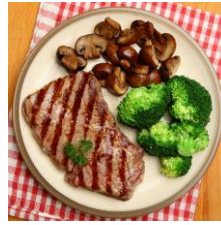

Garnish: Broccoli

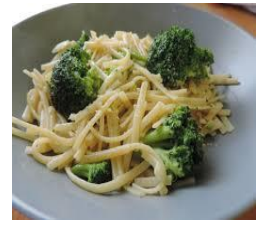

Ingredient of a dish: Pasta with cheese and broccoli

|                                                                                                                         |                                                                                                                      |                                                                                                             |                                                                                                           |
|-------------------------------------------------------------------------------------------------------------------------|----------------------------------------------------------------------------------------------------------------------|-------------------------------------------------------------------------------------------------------------|-----------------------------------------------------------------------------------------------------------|
| <b>A</b><br><br>Zucchini/<br>Pumpkin | <b>B</b><br><br>Lettuce/<br>Canon | <b>C</b><br><br>Cucumber | <b>D</b><br><br>Tomato |
|-------------------------------------------------------------------------------------------------------------------------|----------------------------------------------------------------------------------------------------------------------|-------------------------------------------------------------------------------------------------------------|-----------------------------------------------------------------------------------------------------------|

|                          |              |                 |                   |
|--------------------------|--------------|-----------------|-------------------|
| Frequency of consumption | <b>Daily</b> | <b>Per week</b> | <b>Per month</b>  |
|                          | A:           | A:              | A:                |
|                          | B:           | B:              | B:                |
|                          | C:           | C:              | C:                |
| D:                       | D:           | D:              |                   |
| Serving size             | <b>Dish</b>  | <b>Garnish</b>  | <b>Ingredient</b> |
|                          |              |                 |                   |

|                                                                                                                           |                                                                                                                             |                                                                                                             |                                                                                                           |
|---------------------------------------------------------------------------------------------------------------------------|-----------------------------------------------------------------------------------------------------------------------------|-------------------------------------------------------------------------------------------------------------|-----------------------------------------------------------------------------------------------------------|
| <b>A</b><br><br>Eggplant/<br>Asparagus | <b>B</b><br><br>Cauliflower/<br>Broccoli | <b>C</b><br><br>Mushroom | <b>D</b><br><br>Pepper |
|---------------------------------------------------------------------------------------------------------------------------|-----------------------------------------------------------------------------------------------------------------------------|-------------------------------------------------------------------------------------------------------------|-----------------------------------------------------------------------------------------------------------|

|                          |              |                 |                   |
|--------------------------|--------------|-----------------|-------------------|
| Frequency of consumption | <b>Daily</b> | <b>Per week</b> | <b>Per month</b>  |
|                          | A:           | A:              | A:                |
|                          | B:           | B:              | B:                |
|                          | C:           | C:              | C:                |
| D:                       | D:           | D:              |                   |
| Serving size             | <b>Dish</b>  | <b>Garnish</b>  | <b>Ingredient</b> |
|                          |              |                 |                   |

|                                                                                                                      |                                                                                                                             |                                                                                                           |                                                                                                         |
|----------------------------------------------------------------------------------------------------------------------|-----------------------------------------------------------------------------------------------------------------------------|-----------------------------------------------------------------------------------------------------------|---------------------------------------------------------------------------------------------------------|
| <b>A</b><br><br>Chard/<br>Spinach | <b>B</b><br><br>Artichoke/<br>Green bean | <b>C</b><br><br>Carrot | <b>D</b><br><br>Beet |
|----------------------------------------------------------------------------------------------------------------------|-----------------------------------------------------------------------------------------------------------------------------|-----------------------------------------------------------------------------------------------------------|---------------------------------------------------------------------------------------------------------|

|                          |              |                 |                   |
|--------------------------|--------------|-----------------|-------------------|
| Frequency of consumption | <b>Daily</b> | <b>Per week</b> | <b>Per month</b>  |
|                          | A:           | A:              | A:                |
|                          | B:           | B:              | B:                |
|                          | C:           | C:              | C:                |
| D:                       | D:           | D:              |                   |
| Serving size             | <b>Dish</b>  | <b>Garnish</b>  | <b>Ingredient</b> |
|                          |              |                 |                   |
